# Supplementary material for: Dopamine D2 receptor signaling in the brain modulates circadian liver metabolomic profiles
Source: PubMed Central journal article supplement — Proc Natl Acad Sci U S A. 2022 Mar 10;119(11):e2117113119. doi: 10.1073/pnas.2117113119 (PMC8931347; doi:10.1073/pnas.2117113119), 2022-03-10
Supplement: pnas.2117113119.sapp.pdf [file pnas.2117113119.sapp.pdf]

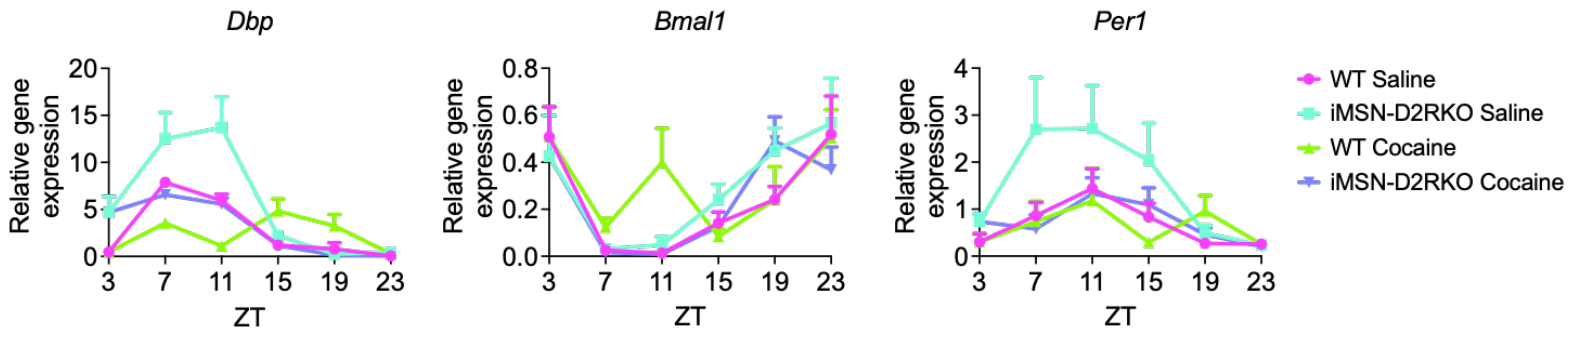

**Fig. S1 Rhythmicity of core clock genes.** qPCR analysis of *Dbp*, *Arntl* (*Bmal1*), and *Per1* in the liver samples used for metabolomics.

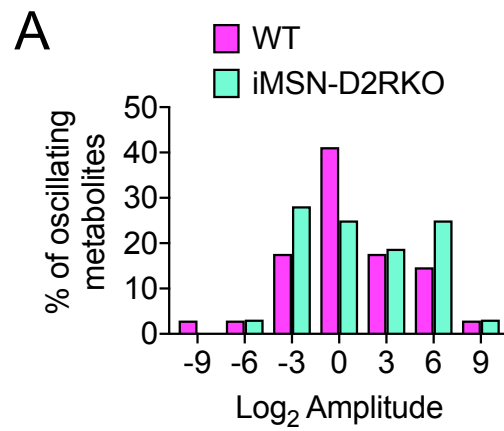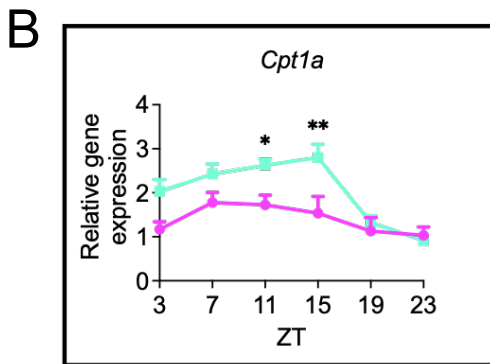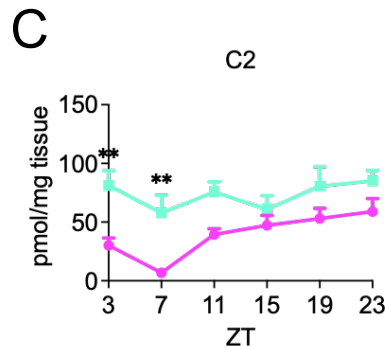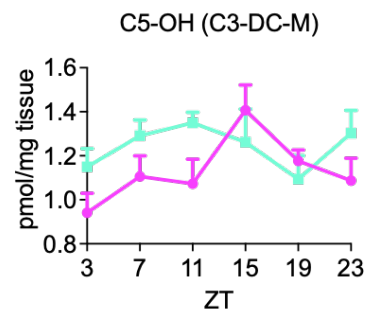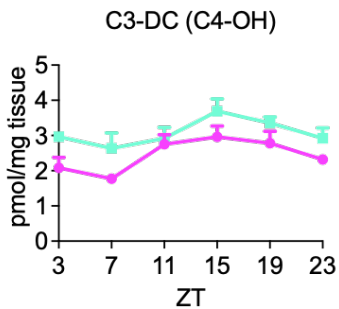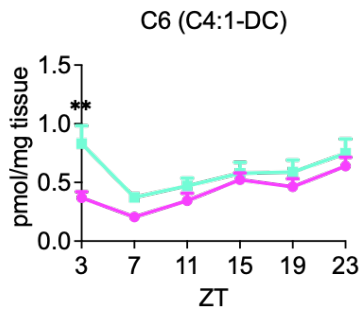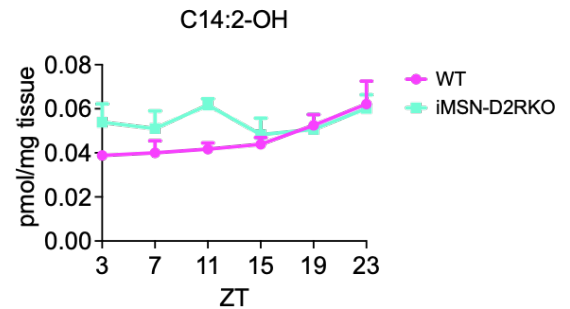

**Fig. S2 Analysis of rhythmic metabolites in WT and iMSN-D2RKO mouse liver. A.** Analysis of the distribution of amplitude size as a percentage of hepatic oscillating metabolites in WT (pink) or iMSN-D2RKO (blue) mice. **B.** qPCR analysis of *Cpt1a* gene expression in WT or iMSN-D2RKO mouse livers along the circadian timepoints. **C.** Concentrations of the five acylcarnitines which significantly lost rhythmicity in the iMSN-D2RKO mice compared to the WT mice. \* $p < 0.05$ , \*\* $p < 0.01$ . 2-way ANOVA followed by Tukey's multiple comparisons test.

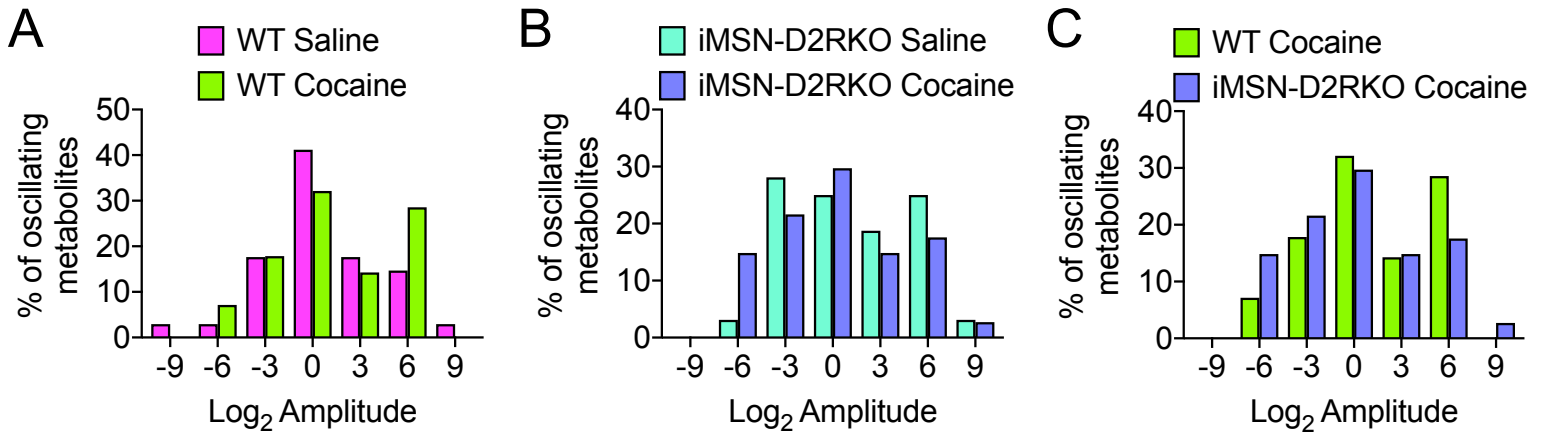

**Fig. S3 Cocaine fails to alter metabolite amplitudes.** **A.** Analysis of the distribution of amplitude size as a percentage of hepatic oscillating metabolites in WT treated with Saline (pink) or Cocaine (green). **B.** Analysis of the distribution of amplitude size as a percentage of hepatic oscillating metabolites in iMSN-D2RKO treated with Saline (blue) or Cocaine (purple). **C.** Analysis of the distribution of amplitude size as a percentage of hepatic oscillating metabolites in WT (green) or iMSN-D2RKO (purple) mice after Cocaine treatment.

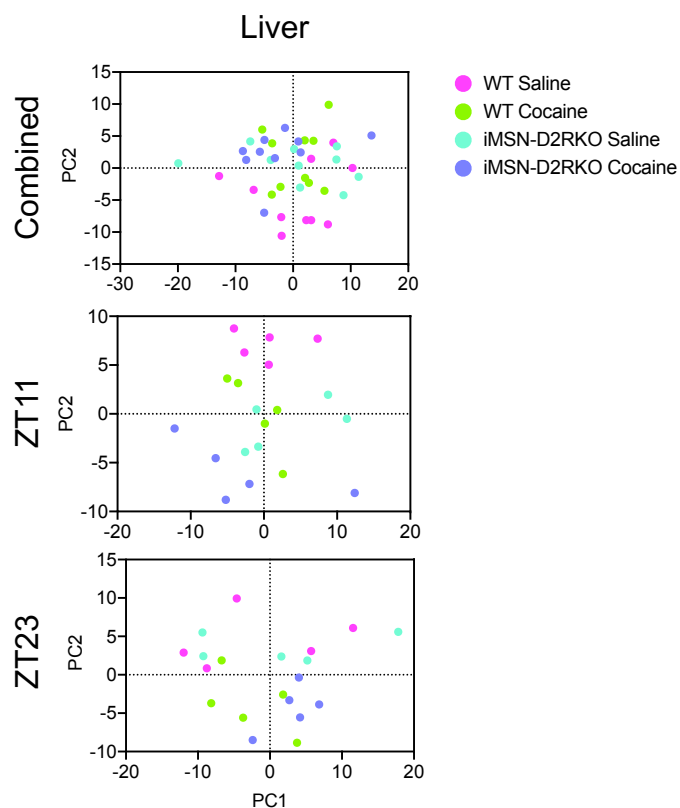

**Fig. S4 Principal component analysis of metabolomic data from liver.** Principal components for the combined ZT11 and ZT23 (top) datasets of each condition, WT Saline, WT Cocaine, iMSN-D2RKO Saline and iMSN-D2RKO Cocaine treated were analyzed in the liver. PCA plots for the ZT11 datasets (center) and ZT23 datasets (bottom) of each condition, WT Saline, WT Cocaine, iMSN-D2RKO Saline and iMSN-D2RKO Cocaine treated were analyzed in the liver.
